# Supplementary material
Source: PubMed Central journal article supplement (PMC3386539)

**Supplemental Fig. 1. Tissue morphology of tubule fragments after 20h in culture.**

Stage VII-VIII seminiferous tubule fragments were incubated for 20 h in Vehicle (A), testosterone (B), Flutamide (C), T + PP2 (D), T + FSH (E), or T +PD98059 (F). The tubule fragments were Bouins fixed, embedded in paraffin and longitudinal 5  $\mu$ m sections were stained with PAS and hematoxylin. Note that in all panels spermatocytes, stage 8-9 round spermatids and elongated spermatids/mature spermatozoa are present and positioned correctly. Densely staining spheroids in the lumen are residual bodies. There is little or no evidence of vacuoles or cell necrosis. Images were taken with a 40X objective and a Leica DMRBE microscope.

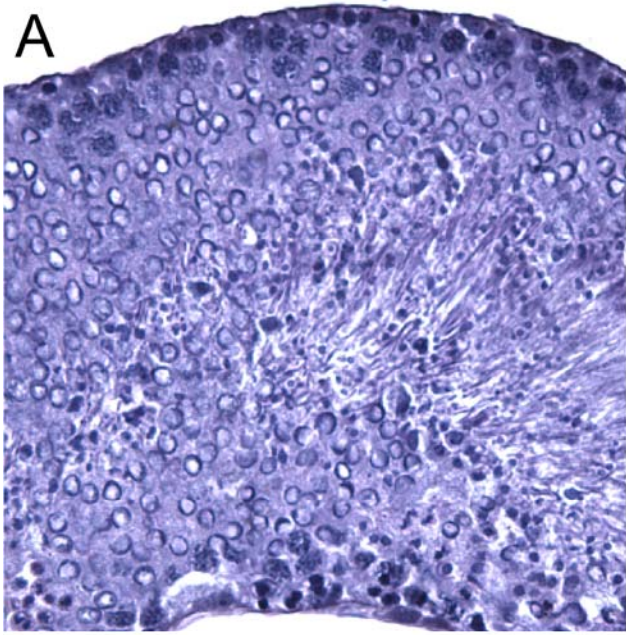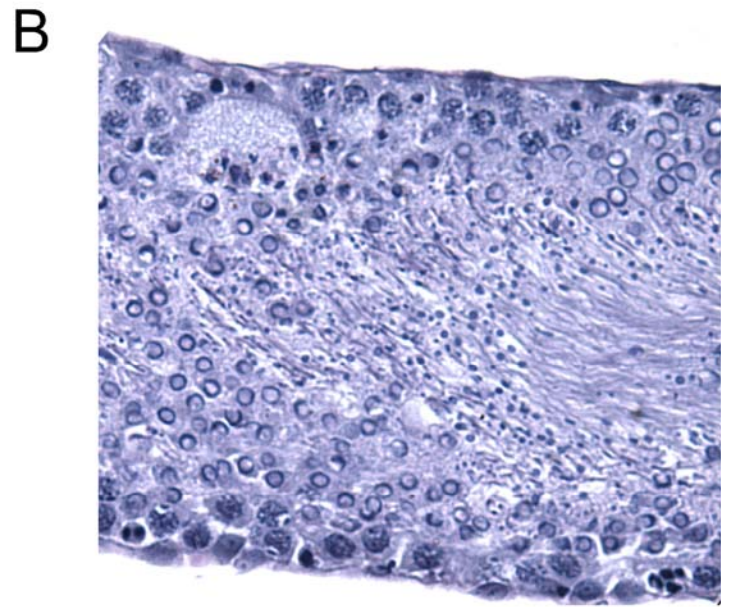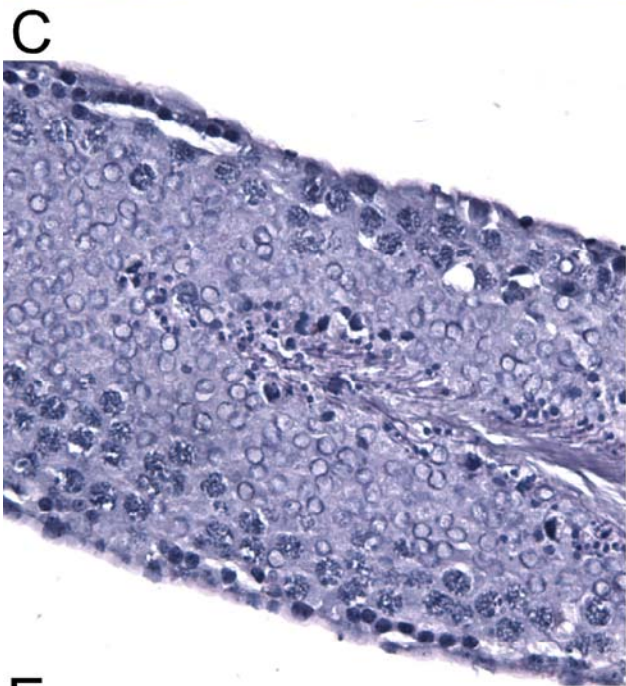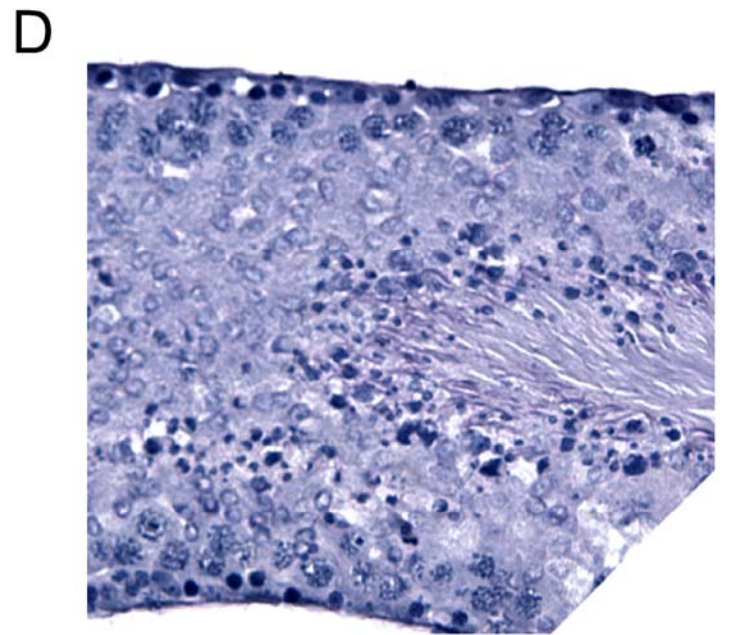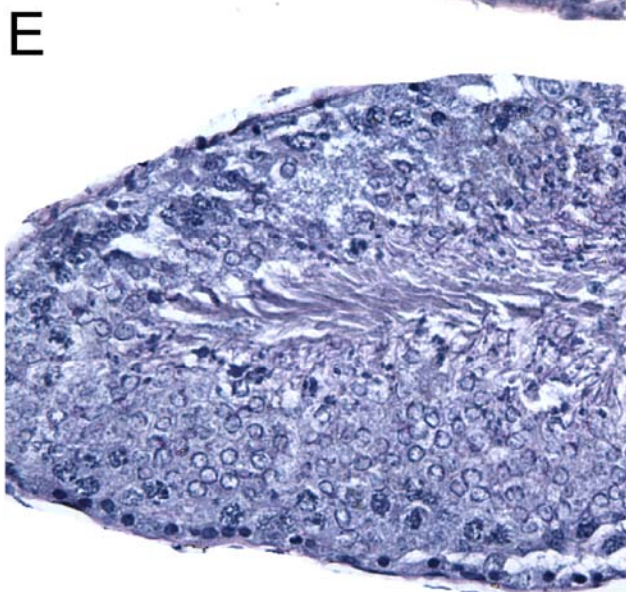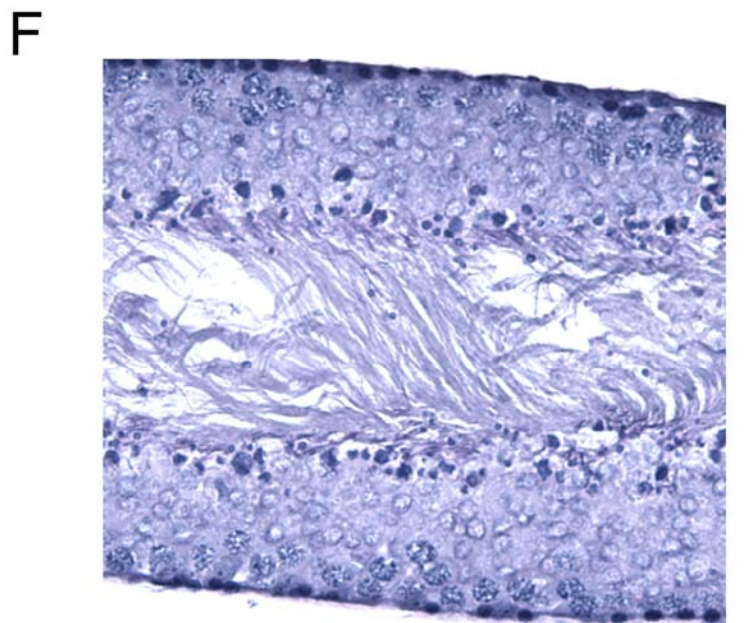

Supplement: supp_me.2010-0030_ME-10-0030_supp_fig_1.pdf [file supp_me.2010-0030_ME-10-0030_supp_fig_1.pdf]
